# Supplementary material for: High-performance quantum dot light-emitting diodes using chip-scale package structures with high reliability and wide color gamut for backlight displays
Source: Royal Society of Chemistry journal article supplement (doi:10.1039/c8ra07928e), 2018-01-01

## SUPPORTING INFORMATION

### High-Performance Quantum Dot Light-Emitting Diodes using Chip-Scaled Package

#### Structures with High Reliability and Wide Color Gamut for Backlight Displays

Chun-Feng Lai,<sup>\*,†</sup> Yu-Chien Tien,<sup>†</sup> Hung-Chun Tong,<sup>§</sup> Chang-Zhi Zhong,<sup>§</sup> and Yu-Chun Lee<sup>§</sup>

<sup>†</sup>Department of Photonics, Feng Chia University, Seatwen, Taichung 40724, Taiwan

<sup>§</sup>Lextar Electronics Corp., Hsinchu Science Park, Hsinchu 30075, Taiwan

\*Corresponding authors: [chunflai@fcu.edu.tw](mailto:chunflai@fcu.edu.tw) (Prof. Chun-Feng Lai)

Figure S1. EDS spectrum of CdZnSeS/ZnS core-shell QDs. Inset table presents the element ratio of CdZnSeS/ZnS QDs.

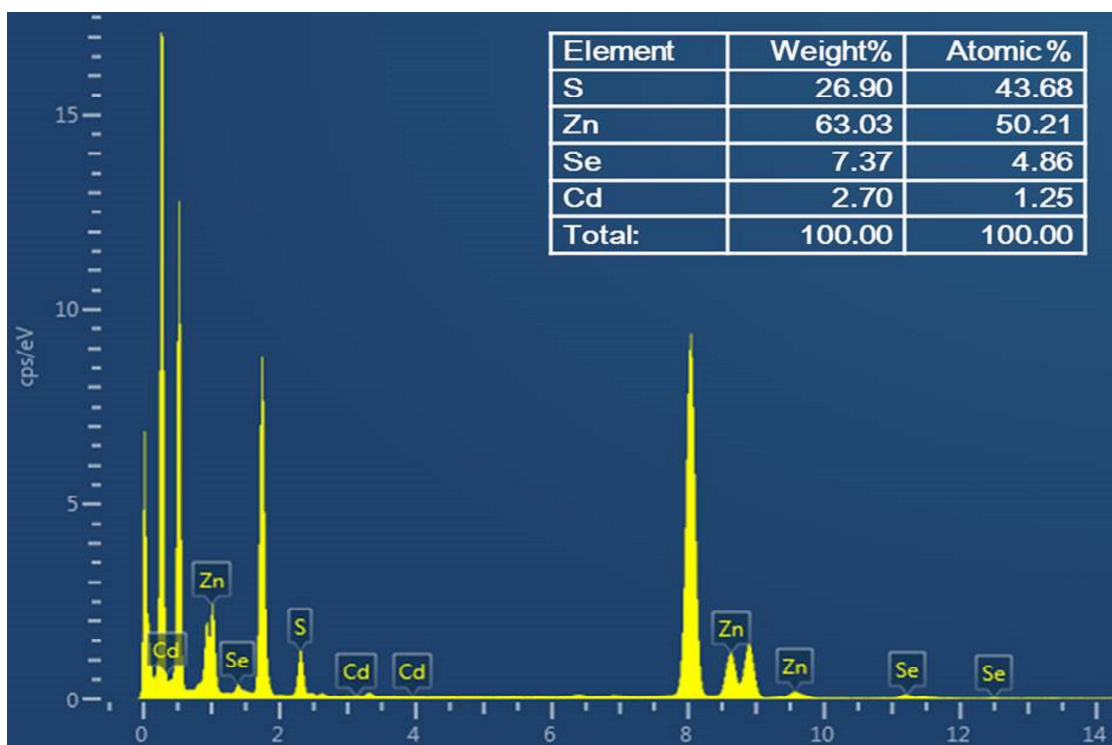

Figure S2. Luminescence spectra of (a) green QDs and (b) KSF phosphor.

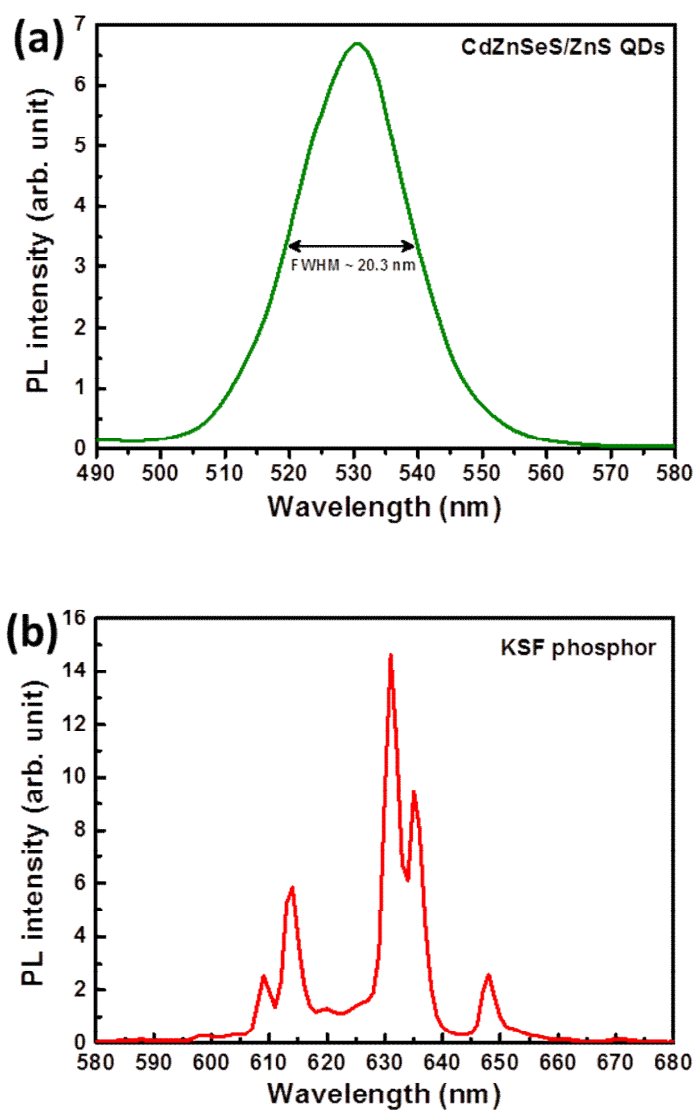

Figure S3. Color distribution of CSP QD-LEDs when CQDF with uniformly and non-uniformly.

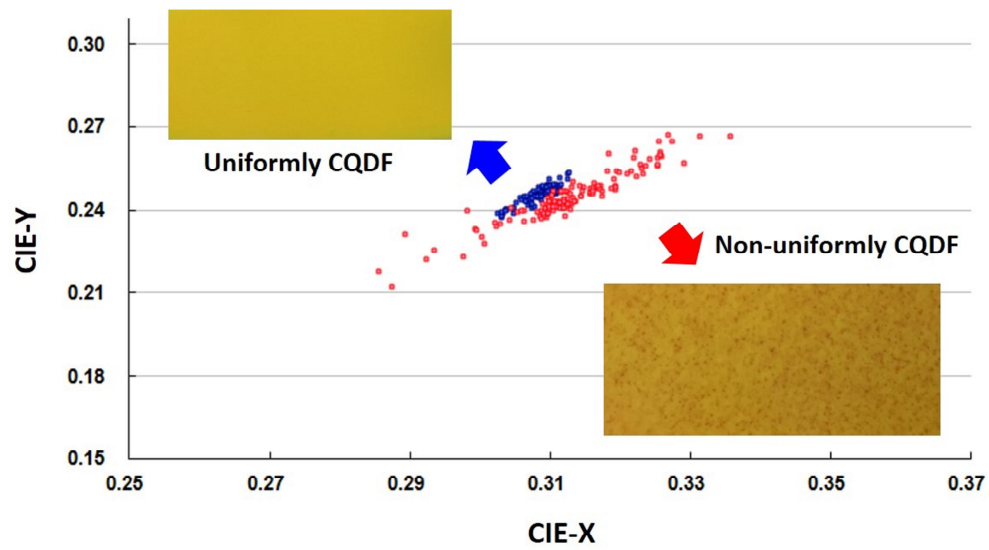

Figure S4. CIE chromaticity diagrams of the CSP QD-LEDs and commercial PLCC LEDs.

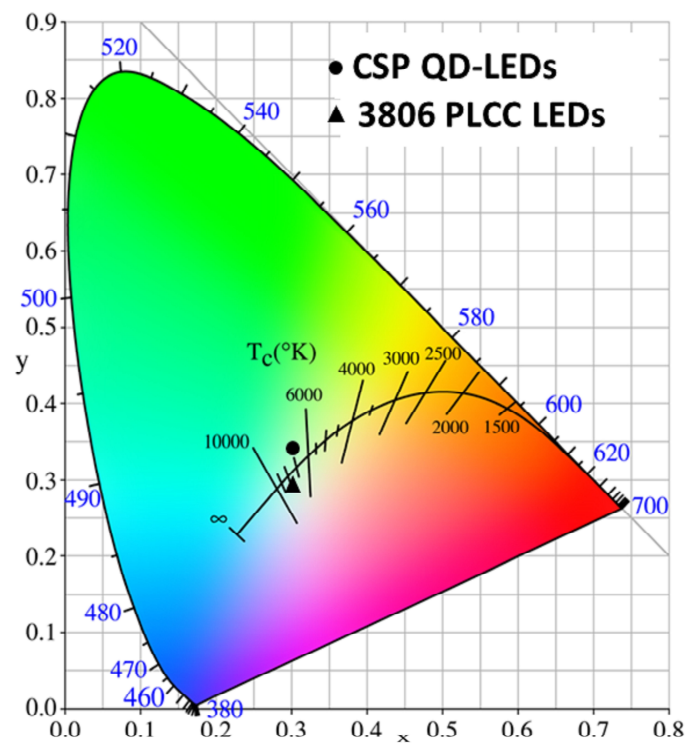

Figure S5. Reflectance spectrum of the white silicone resin plate. Inset shows the digital photographs of white silicone resin plate.

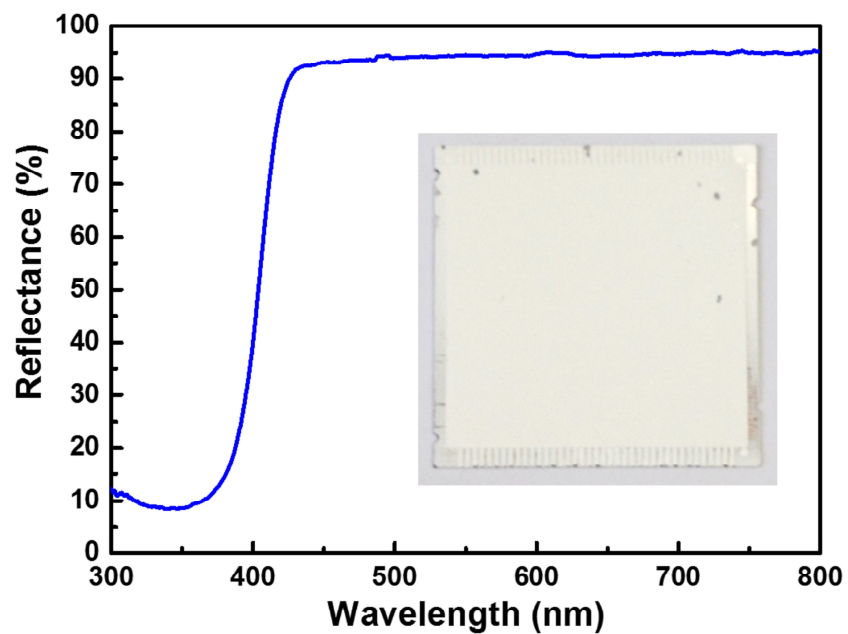

Figure S6. RA test of the long-term stability of two types of QD-LEDs with different packages subjected to 25 °C/50% RH at the flux density of 15.8 W/cm<sup>2</sup>, respectively.

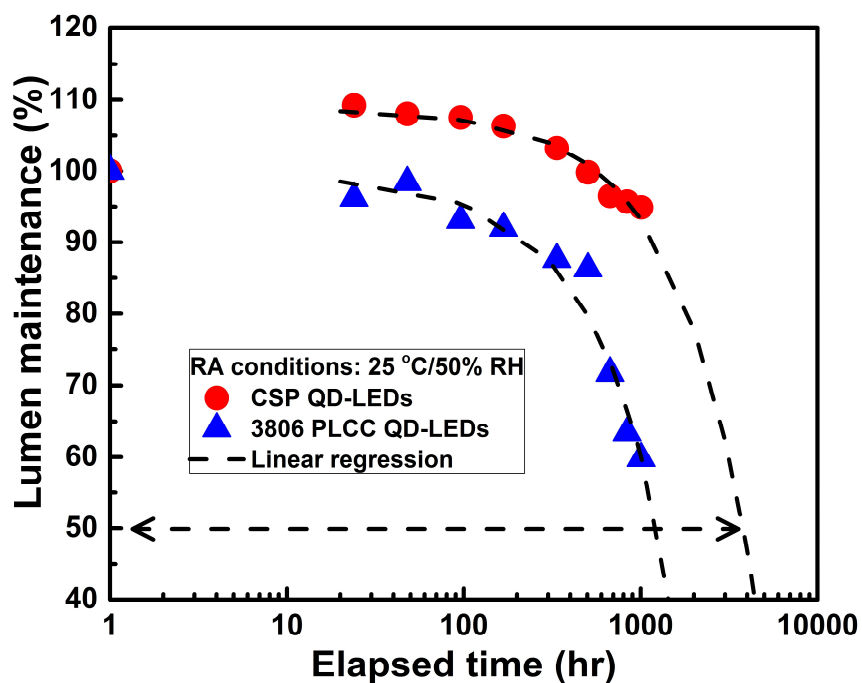

Figure S7. Luminescence spectra of CSP QD-LEDs was tested by through 25 °C/50% RH of RA test.

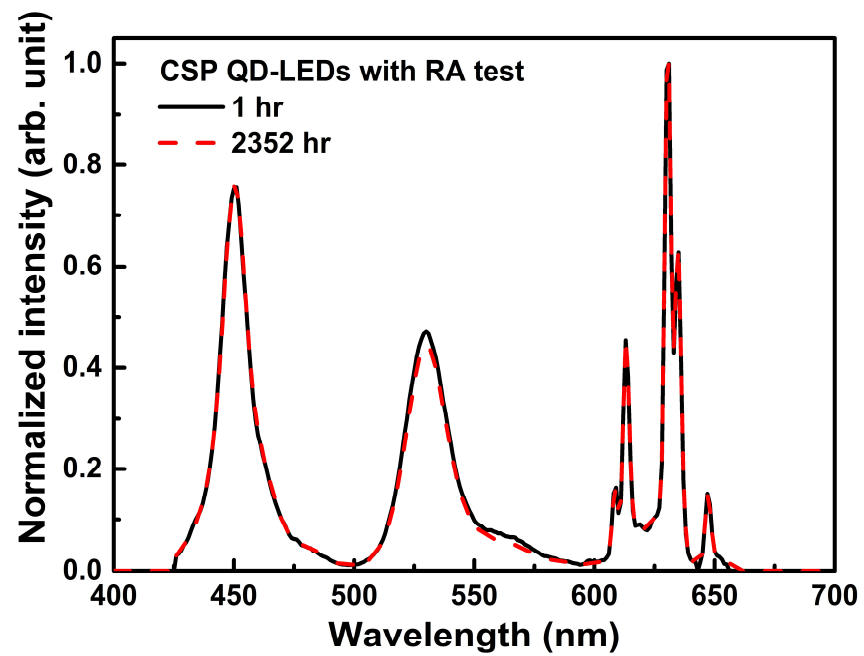

Supplement: c8ra07928e1.pdf [file c8ra07928e1.pdf]
